# Supplementary material for: NSP4 and ORF9b of SARS-CoV-2 Induce Pro-Inflammatory Mitochondrial DNA Release in Inner Membrane-Derived Vesicles
Source: Cells. 2022 Sep 23;11(19):2969. doi: 10.3390/cells11192969 (PMC9561960; doi:10.3390/cells11192969)
Supplement: Supplementary file 1 [file cells-11-02969-s001.zip]

Archive with 10 entries (10 files):
- Figure S1.pptx
- Figure S2.pptx
- Figure S3.pptx
- Figure S4.pptx
- Figure S5.pptx
- Figure S6.pptx
- Figure S7.pptx
- Figure S8.pptx
- Figure S9.pptx
- Supplementary Figure legends 8-08-2022.pdf
