# Supplementary material for: NSP4 and ORF9b of SARS-CoV-2 Induce Pro-Inflammatory Mitochondrial DNA Release in Inner Membrane-Derived Vesicles
Source: Cells. 2022 Sep 23;11(19):2969. doi: 10.3390/cells11192969 (PMC9561960; doi:10.3390/cells11192969)
Supplement: Supplementary file 1 [file cells-11-02969-s001.zip › Supplementary Figure legends 8-08-2022.pdf]

## Figure legends

### Figure S1:

#### COVID-19 patient plasma contains pro-inflammatory mtDNA

(a) Heat map showing RT-qPCR results of S gene to be absent in swab samples from patients suspected to be infected with omicron variant. The samples were positive for other SARS-CoV-2 genes like N and RNA-dependent RNA polymerase (RdRP) with RNaseP as internal control. PC indicates positive control, which are S gene positive samples (b) Relative mRNA expression of *IL1B* with respect to *ACTB* in NHBE cells incubated with plasma from COVID-19<sup>-ve</sup> and COVID-19<sup>+ve</sup> patients, respectively (n=8). (c) Representative flow cytometry histograms showing cell death in plasma treated NHBE cells, as observed with SYTOX green staining. Numbers indicate % cell death. (d) Representation of the flow cytometry data in *panel c* as % cell death. (e) Representative gel picture showing the expression of ND2 gene (representing mtDNA), as observed after performing PCR of ChIP samples. G1-G8 represents groups, with each group containing pooled plasma from 10 patients. (f) Relative mRNA expression of *IL6* with respect to *ACTB* in NHBE cells incubated with various concentrations of mtDNA (n=6). (g) Quantitative analysis of IL-6 in the total protein extracted from NHBE cells treated with increasing concentrations of mtDNA, as measured by ELISA. Data is represented in picograms/mL (n=6). (h) Representative flow cytometry histograms showing cell death in mtDNA treated NHBE cells, as observed with SYTOX green staining. Numbers indicate % cell death. (i) Representation of the flow cytometry data in *panel c* as % cell death (n=4). (j) Quantitative analysis of cytochrome c (Cyt c) in the plasma of COVID-19<sup>-VE</sup> (20) and COVID-19<sup>+VE</sup> (30) patients, as measured by ELISA. Data is represented in nanograms/mL. All data are represented as mean  $\pm$  SEM of three independent experiments, analyzed by non-parametric *t* test using Graphpad Prism software. \*\*\**P* < 0.001; \*\*\*\**P* < 0.0001; ns: not significant.

### Figure S2:

#### SARS-CoV-2 causes mitochondrial damage

(a) Representative LIGHTNING microscopy images showing changes in mitochondrial morphology, as visualized by anti-TOM20 staining in SARS-CoV-2 infected A549 cells. The insets of these images are shown in *Fig. 2e*. (b) Complete image panels of the representative images shown in *Fig. 2j*. (c, d) Representative images showing cGAS (green) and NLRP3 (red) expression in A549 cells infected with SARS-CoV-2. DAPI (blue) was used to label nuclei. (e) Quantitative analysis of images in *panel c* and *d* (n= 14). Data is represented as the integrated density of the signal of respective proteins. All data are represented as mean  $\pm$  SEM of three independent experiments, analyzed by non-parametric *t* test using Graphpad Prism software. \**P* < 0.05. Scale bars: a, b: 10  $\mu$ m; c, d: 50  $\mu$ m.

### Figure S3

### **SARS-CoV-2 proteins NSP4 and ORF9b induce release of mtDNA**

**(a)** Heat map showing the cytochrome c (Cyt c) levels associated with mitochondria when A549 cells were individually transfected with the 29 SARS-CoV-2 plasmids individually and stained with anti-Cyt c antibody. Images were taken 24 h post-transfection, followed by image analysis. A combination of ActD+ABT+zVD (2h) was used as positive control for mtDNA release. **(b)** Representative flow cytometry histograms showing measurement of mtROS and **(c)**  $\Delta\Psi_m$  by staining the cells with TMRE and mitoSOX, respectively. Antimycin C (AntC) was used as positive control for mtROS, and FCCP for  $\Delta\Psi_m$ . **(d)** Representative images showing co-localization of picogreen stained mtDNA and mitotracker red stained mitochondria (MTR; pseudocolored as green), indicating mtDNA associated with mitochondria in A549 cells transduced with lentivirus encoded SARS-CoV-2 proteins as shown in *Fig. 3b*. Data is represented as mean  $\pm$  SEM of three independent experiments. Scale bar: 10  $\mu$ m.

### **Figure S4:**

#### **NSP4 and ORF9b of SARS-CoV-2 does not induce expression of cytosolic DNA sensors.**

Representative immunoblot showing cGAS and NLRP3 expression in A549 cells transduced with N4+9b for 48h, followed by cell lysis and total protein extraction. Anti-cGAS and anti-NLRP3 antibodies were used to detect cGAS and NLRP3 respectively. A combination of ActD+ABT+zVD (2h) was used as positive control to induce the expression of these DNA sensors.

### **Figure S5**

#### **NSP4 and ORF9b lead to mitochondrial structural changes and macropore formation**

**(a)** Representative images showing mitochondrial shape changes in cells transduced with VEC or N4+9b, as observed with mitotracker red (MTR; pseudocolored as green) with images analysis shown in *Fig. 4a*. Rotenone (Rot) was used as a positive control to induce mitochondrial shape changes. **(b)** Representative flow cytometry histograms showing cell death, as measured by SYTOX green staining. A549 cells were co-transduced with N4+9b with or without PINK1 lentiviral expression vector (PINK1<sup>PLV</sup>). VEC1 represents the backbone construct for N4 and 9b plasmids, while VEC2 represents the backbone construct for PINK1 plasmid. Numbers indicate cell death percentage. **(c)** Cell death represented as % cell death analyzed from the histograms shown in *panel b* (n= 6). **(d)** Representative images showing BAK and **(e)** BAX (red) associated with anti-TOM20 stained mitochondria (green) in A549 cells transduced either with VEC or N4+9b. A combination of ActD+ABT+zVD (2h) was used as positive control. These images represent all the panels of images shown in *Fig. 4h, j*. Data is represented as mean  $\pm$  SEM of three independent experiments, analyzed by non-parametric *t* test, \**P* < 0.05; \*\*\**P* < 0.001. Scale bars: 10  $\mu$ m.

### **Figure S6**

#### **MCL1 downregulation and NSP4/ORF9b induce inner membrane disruption**

**(a)** RT-qPCR data showing relative fold change expression of MCL1 upon transduction of A549 cells with Scramble (Srm) or shRNA targeting MCL1, followed by RNA extraction and RT-qPCR analysis (n= 6). **(b)** Representative images showing rupture of inner mitochondrial membrane of A549 cells transduced with N4+9b, stained with inner membrane targeted GFP (IMM<sup>GFP</sup>) and anti-TOM20 to probe outer membrane. **(c)** Representative images showing of COX-IV expression in cells transduced with N4+9b, or **(d)** MCL1 shRNA, and stained with anti-TOM20. All data are represented as mean  $\pm$  SEM of three independent experiments, analyzed by non-parametric *t* test, \*\*\*\**P* < 0.0001. Scale bars: 10  $\mu$ m.

## Figure S7

### BAK downregulation and MCL1 overexpression in MSCs increases intercellular mitochondrial transfer

**(a)** RT-qPCR data showing relative fold change expression of BAK upon transduction of A549 cells with Scramble (Srm) or shRNA targeting BAK. **(b)** Similarly, immunofluorescence was done followed by quantitative analysis of the images which indicate knockdown of BAK. **(c, d)** Lentiviral encoded VEC or MCL1 overexpression in MSCs (MCL1<sup>pLV</sup>), followed by either RNA extraction and RT-qPCR analysis (n= 6). **(c)** or immunofluorescence analysis of the images **(d)**. **(e)** Representative flow cytometry histograms showing no change in the stem cell phenotype upon dual modification of MSCs by MCL1 overexpression and BAK knockdown by shRNA. **(f)** Representative images showing N4+9b transduced A549 stained with CTDR (red) and co-cultured with MSCs expressing mitoGFP (green). The images represent the quantitative data shown in Fig7f. **(g, h)** Quantitative analysis of the images by specifically measuring the fluorescence signal in A549 cells after co-culture with MSC<sup>Srm+V2</sup> or MSC<sup>shBAK+MCL1</sup>. The data represents the signal of BAK on mitochondria **(g)** or MCL1 on mitochondria **(h)**. A549 cells were transduced with vector or N4+9b before co-culture. All data are represented as mean  $\pm$  SEM of three independent experiments, analyzed by non-parametric *t* test, \*\*\*\**P* < 0.0001. Scale bar: 20  $\mu$ m.

## Figure S8

### MSCs modulated with BAK shRNA and MCL1 overexpression plasmid attenuate cell death in A549 cells.

**(a)** Representative images showing cell death by fluorescent TUNEL assay (red) in A549 cells. SARS-CoV-2 infected cells were co-cultured with MSCs expressing either scramble vector (Srm) and vector (V2) or dual transduction of BAK-shRNA and MCL1 overexpression plasmid, and stained with cell tracker green (CTG), followed by TUNEL staining (red). CTG stained dead cells appear yellow. **(b)** Quantitative analysis of TUNEL and CTG dual positive cells were counted and plotted as no. of A549 dead cells (n= 12). **(c)** Quantitative analysis of TUNEL and CTG dual positive cells done similar to panel b except that instead of SARS-CoV-2 infection, A549 cells were transduced with N4+9b (n= 14). **(d)** PCR analysis showing mtDNA copy number in the cell supernatant of co-culture of A549 cells and MSCs. A549 were transduced with N4+9b, whereas MSCs were modulated with BAK shRNA and MCL1 overexpression plasmid (n= 7). All data are

represented as mean  $\pm$  SEM of three independent experiments, analyzed by non-parametric  $t$  test, \*\*\* $P$  < 0.001; \*\*\*\* $P$  < 0.0001. Scale bar: 100  $\mu$ m.

### **Figure S9**

#### **Source data of all the blots.**

The original full blots for the representative figures shown in Main and Supplementary Figures.

## Supplementary Table

| Sr No | Cell line  | Company        | Cat no   |
|-------|------------|----------------|----------|
| 1     | A549       | ATCC           | CCL-185  |
| 2     | NHBE       | LONZA          | CC-2540S |
| 3     | Human MSCs | Apolo hospital |          |

| Sr No | Primary Antibodies         | Company                   | Identifier                         |
|-------|----------------------------|---------------------------|------------------------------------|
| 1     | Anti-TOMM20                | Abcam                     | Cat# ab56783, RRID:AB_945896       |
| 2     | Anti-VDAC1                 | Abcam                     | Cat# ab15895, RRID:AB_2214787      |
| 3     | Anti-PINK1                 | Abcam                     | Cat# ab75487, RRID:AB_1310581      |
| 4     | Anti-Cytochrome C          | Abcam                     | Cat# ab90529, RRID:AB_10673869     |
| 5     | Anti-Parkin                | Cell Signaling Technology | Cat# 2132, RRID:AB_10693040        |
| 6     | Anti-TFAM                  | Abcam                     | Cat# ab131607, RRID:AB_11154693    |
| 7     | Anti-Bax (D2E11)           | Cell Signaling Technology | Cat# 5023, RRID:AB_10557411        |
| 8     | Anti-Bak (D4E4)            | Cell Signaling Technology | Cat# 12105, RRID:AB_2716685        |
| 9     | Anti-Mcl-1 (D2W9E)         | Cell Signaling Technology | Cat# 94296, RRID:AB_2722740        |
| 10    | Anti-COX IV (3E11)         | Cell Signaling Technology | Cat# 4850, RRID:AB_2085424         |
| 11    | Anti-GFP                   | Abcam                     | Cat# ab290, RRID:AB_303395         |
| 12    | Anti-Bcl-xL (54H6)         | Cell Signaling Technology | Cat# 2764, RRID:AB_2228008         |
| 13    | Anti-GAPDH                 | Santa Cruz Biotechnology  | Cat# sc-32233, RRID:AB_627679      |
| 14    | Anti-E-cadherin            | Santa Cruz Biotechnology  | Cat# sc-8426, RRID:AB_626780       |
| 15    | Anti-Strep-tag II antibody | Abcam                     | Cat# ab76949, RRID:AB_1524455      |
| 16    | Anti-Spike (SARS CoV-2)    | CST                       | Cat# 52342, RRID: Not Available    |
| 17    | IgG                        | Abcam                     | Cat# ab172730, RRID: 2687931       |
| 18    | Anti-DNA                   | Abcam                     | Cat# ab273137, RRID: Not available |
| 19    | TFAM (D5C8) Rabbit         | CST                       | Cat #8076, RRID: AB_10949110       |

| Sr No | Commercial assay Kits              | Source      | Catalog number       |
|-------|------------------------------------|-------------|----------------------|
| 1     | Live and Dead Cell Assay           | Abcam       | Cat# ab115347        |
| 2     | IL-1 beta Human Elisa Kit          | R&D Systems | Cat # DLB50          |
| 3     | Immunoprecipitation kit            | Abcam       | Cat # ab206996       |
| 4     | SYTOX                              | Invitrogen  | Cat # R37168         |
| 5     | DeadEnd™ Colorimetric TUNEL System | Promega     | G7130                |
| 6     | Mitochondria Isolation Kit         | Sigma       | MITOISO2-1KT         |
| 7     | QIAamp Viral RNA Mini Kit (50)     | Qiagen      | Cat. No. / ID: 52904 |

| Sr No | Plasmid name                                       | Source        | Addgene no           |
|-------|----------------------------------------------------|---------------|----------------------|
| 1     | pWPI-IRES-Puro-Ak-ACE2-TMPRSS2                     | Addgene       | RRID:Addgene_154987  |
| 2     | pcDNA3 TFAM-mClover                                | Addgene       | RRID:Addgene_129574  |
| 3     | pLYS1-FLAG-MitoGFP-HA                              | Addgene       | RRID:Addgene_50057   |
| 4     | pCMV-VSV-G                                         | Addgene       | RRID:Addgene_8454    |
| 5     | pCMV-dR8.2 dvpr                                    | Addgene       | RRID:Addgene_8455    |
| 6     | pLVX-EF1alpha-nCoV2019-nsp1-2xStrep-IRES-Puro      | Addgene       | RRID:Addgene_141367  |
| 7     | pLVX-EF1alpha-nCoV2019-nsp2-2xStrep-IRES-Puro      | Addgene       | RRID:Addgene_141368  |
| 8     | pLVX-EF1alpha-nCoV2019-nsp4-2xStrep-IRES-Puro      | Addgene       | RRID:Addgene_141369  |
| 9     | pLVX-EF1alpha-nCoV2019-nsp5-2xStrep-IRES-Puro      | Addgene       | RRID:Addgene_141370  |
| 10    | pLVX-EF1alpha-nCoV2019-nsp6-2xStrep-IRES-Puro      | Addgene       | RRID:Addgene_141372  |
| 11    | pLVX-EF1alpha-nCoV2019-nsp7-2xStrep-IRES-Puro      | Addgene       | RRID:Addgene_141373  |
| 12    | pLVX-EF1alpha-nCoV2019-nsp8-2xStrep-IRES-Puro      | Addgene       | RRID:Addgene_141374  |
| 13    | pLVX-EF1alpha-nCoV2019-nsp9-2xStrep-IRES-Puro      | Addgene       | RRID:Addgene_141375  |
| 14    | pLVX-EF1alpha-nCoV2019-nsp10-2xStrep-IRES-Puro     | Addgene       | RRID:Addgene_141376  |
| 15    | pLVX-EF1alpha-nCoV2019-nsp11-2xStrep-IRES-Puro     | Addgene       | RRID:Addgene_141377  |
| 16    | pLVX-EF1alpha-nCoV2019-nsp12-2xStrep-IRES-Puro     | Addgene       | RRID:Addgene_141378  |
| 17    | pLVX-EF1alpha-nCoV2019-nsp13-2xStrep-IRES-Puro     | Addgene       | RRID:Addgene_141379  |
| 18    | pLVX-EF1alpha-2xStrep-nCoV2019-nsp14--IRES-Puro    | Addgene       | RRID:Addgene_141380  |
| 19    | pLVX-EF1alpha-nCoV2019-nsp15-2xStrep-IRES-Puro.dna | Addgene       | RRID:Addgene_141381  |
| 20    | pTwist-EF1alpha-nCoV-2019-S-2xStrep                | Addgene       | RRID: Addgene_141382 |
| 21    | pLVX-EF1alpha-nCoV2019-orf3a-IRES-Puro             | Addgene       | RRID:Addgene_141383  |
| 22    | pLVX-EF1alpha-2xStrep-nCoV2019-orf3b-IRES-Puro     | Addgene       | RRID:Addgene_141384  |
| 23    | pLVX-EF1alpha-nCoV2019-E-IRES-Puro                 | Addgene       | RRID:Addgene_141385  |
| 24    | pLVX-EF1alpha-nCoV2019-M-IRES-Puro                 | Addgene       | RRID:Addgene_141386  |
| 25    | pLVX-EF1alpha-nCoV2019-orf6-IRES-Puro              | Addgene       | RRID:Addgene_141387  |
| 26    | pLVX-EF1alpha-nCoV2019-orf7a-IRES-Puro             | Addgene       | RRID:Addgene_141388  |
| 27    | pLVX-EF1alpha-2xStrep-nCoV2019-orf7b-IRES-Puro     | Addgene       | RRID:Addgene_141389  |
| 28    | pLVX-EF1alpha-nCoV2019-orf8-IRES-Puro              | Addgene       | RRID:Addgene_141390  |
| 29    | pLVX-EF1alpha-nCoV2019-N-IRES-Puro                 | Addgene       | RRID:Addgene_141391  |
| 30    | pLVX-EF1alpha-nCoV2019-orf9b-IRES-Puro             | Addgene       | RRID:Addgene_141392  |
| 31    | pLVX-EF1alpha-2xStrep-nCoV2019-orf9c-IRES-Puro     | Addgene       | RRID:Addgene_141393  |
| 32    | pLVX-EF1alpha-nCoV2019-orf10-IRES-Puro             | Addgene       | RRID:Addgene_141394  |
| 33    | pDONR207 SARS-CoV-2 NSP3                           | Addgene       | RRID:Addgene_141257  |
| 34    | pDONR223 SARS-CoV-2 NSP16                          | Addgene       | RRID:Addgene_141269  |
| 35    | EMT vector 1 for SARS CoV 2                        | In this paper |                      |
| 36    | EMT vector 2 for SARS CoV 2                        | In this paper |                      |
| 37    | VEH 1 for MCL-1                                    | In this paper |                      |
| 38    | VEH 2 for MCL-1                                    | In this paper |                      |
| 39    | PINK1 pLV                                          | In this paper |                      |

|    |                                                 |                   |
|----|-------------------------------------------------|-------------------|
| 40 | N4 T492I (Omicron variant)                      | In this paper     |
| 41 | TFAM shRNA                                      | Ahmad et al, 2014 |
| 42 | BCL-xL                                          | In this paper     |
| 43 | Scrambled shRNA (Srm)<br>pLK0.1 vector backbone | In this paper     |

| Sr No | Drugs/Serum/Reagents/Media                                  | Company                  | Catalog no  |
|-------|-------------------------------------------------------------|--------------------------|-------------|
| 1     | ABT-737                                                     | Calbiochem               | 197333      |
| 2     | Actinomycin D                                               | Calbiochem               | 114666      |
| 3     | Z-VAD-FMK                                                   | Sigma-Aldrich            | V116        |
| 4     | Normal Goat Serum                                           | Jackson                  | 005-000-121 |
| 5     | Antimycin A                                                 | Sigma                    | A8674       |
| 6     | Rotenone                                                    | Sigma                    | R8875       |
| 7     | Carbonyl cyanide 4-(trifluoromethoxy)phenylhydrazone (FCCP) | Sigma                    | C2920       |
| 8     | LTX                                                         | Invitrogen               | A12621      |
| 9     | Lipofectamin 3000                                           | Invitrogen               | L3000008    |
| 10    | Ionomycin                                                   | Sigma                    | I0634       |
| 11    | Calcein AM                                                  | Invitrogen               | C1430       |
| 12    | Triton X 100                                                | Sigma                    | T9284       |
| 13    | KAPA SYBER FAST QPCR MM                                     | KAPA                     | kk4601      |
| 14    | Bovine Serum Albumin (BSA)                                  | Bio World                | 22070004-5  |
| 15    | StemPro™ MSC SFM                                            | Gibco                    | A1033201    |
| 16    | Ham's Nutrient Mixture F12                                  | Sigma                    | 51651C      |
| 17    | SuperSignal™ West Femto Maximum Sensitivity Substrate       | Invitrogen               | 34095       |
| 18    | SuperSignal™ West Pico PLUS Chemiluminescent Substrate      | Invitrogen               | 34580       |
| 19    | L-Glutamine (200 mM)                                        | Invitrogen               | 25030081    |
| 20    | PageRuler™ Prestained Protein Ladder                        | Invitrogen               | 26616       |
| 21    | Ampicillin sodium salt                                      | Himedia                  | CMS645-5G   |
| 22    | Protease Inhibitor Cocktail                                 | Sigma                    | p8340       |
| 23    | Fetal Bovine Serum                                          | Gibco                    | 10270106    |
| 24    | Pierce™ 16% Formaldehyde                                    | Invitrogen               | 28908       |
| 25    | Hexadimethrine bromide                                      | Sigma                    | H9268-10G   |
| 26    | Bicinchoninic Acid (BCA)                                    | Sigma                    | B9643-1L    |
| 27    | Penicillin-Streptomycin                                     | Invitrogen               | 15140122    |
| 29    | DMEM, high glucose                                          | Gibco                    | 11965092    |
| 30    | Sodium Pyruvate                                             | Sigma                    | S8636-100ML |
| 31    | Opti-MEM                                                    | Gibco                    | 22600050    |
| 32    | BEGM™-2 BulletKit Medium                                    | Lonza                    | CC-3170     |
| 33    | 2X PCR Master Mix                                           | Thermo Fisher Scientific | K0171       |
| 34    | amaR OnePCR                                                 | GeneDireX, Inc           | SM213-0250  |
| 35    | PE Mouse Anti-Human CD73                                    | BD Biosciences           | 550257      |

|    |                                    |                           |            |
|----|------------------------------------|---------------------------|------------|
| 36 | Anti-Human CD45 FITC/CD34 PE       | BD Biosciences            | 341071     |
| 37 | PE-Cy™5 Mouse Anti-Human CD90      | BD Biosciences            | 555597     |
| 38 | CD44 Monoclonal Antibody (IM7), PE | Thermo fisher/ebioscience | 12-0441-82 |

| Sr No | Dyes              | Company    | Catalog no |
|-------|-------------------|------------|------------|
| 1     | TMRE              | Invitrogen | T669       |
| 2     | MitoSOX Red       | Invitrogen | M36008     |
| 3     | Mitotracker Red   | Invitrogen | M7513      |
| 4     | Mitotracker Green | Invitrogen | M7514      |
| 5     | DAPI              | Invitrogen | P36966     |
| 6     | PicoGreen         | Invitrogen | P11496     |
| 7     | CTDR              | Invitrogen | C34565     |

| Sr No | Software and algorithms | Source                   | Ref                                                                                                                                     |
|-------|-------------------------|--------------------------|-----------------------------------------------------------------------------------------------------------------------------------------|
| 1     | ImageJ                  | (Schneider et al., 2012) | <a href="https://imagej.nih.gov/ij/">https://imagej.nih.gov/ij/</a> ; RRID:SCR_003070                                                   |
| 2     | Prism v7                | GraphPad Software        | <a href="https://www.graphpad.com/scientific-software/prism/">https://www.graphpad.com/scientific-software/prism/</a> ; RRID:SCR_002798 |
| 3     | Imaris v8.0.2           | Bitplane                 | <a href="http://www.bitplane.com/">http://www.bitplane.com/</a> ; RRID:SCR_007370                                                       |
| 4     | FlowJo v10              | FlowJo, Treestar Inc.    | <a href="https://www.flowjo.com/">https://www.flowjo.com/</a> ; RRID:SCR_008520                                                         |

| Sr No | sh RNA       | Sequences                        | Ref            |
|-------|--------------|----------------------------------|----------------|
| 1     | MCL1 shRNA-1 | 5' GCAAGAGGATTATGGCTAA3'         | In this paper  |
| 2     | MCL1 shRNA-2 | 5' GTTGATGAATGGAAATCTTTCACT3'    | In this paper  |
| 3     | MCL1 shRNA-3 | 5' CCAGTATACTTCTTAGAAAGTCCAA3'   | In this paper  |
| 4     | BAK shRNA1   | 5' CCCATTCACTACAGGTGAA3'         | PMID: 34385422 |
| 5     | BAK shRNA2   | 5' ATGGTCACCTTACCTCTGCAACC3'     | PMID: 34385422 |
| 6     | BAK shRNA3   | 5' GGTACGAAGATTCTTC<br>AAATCAT3' | PMID: 34385422 |
| 7     | BAX shRNA1   | 5' GCTCTGAGCAGATCATGAA 3'        | PMID: 34385422 |
| 8     | BAX shRNA2   | 5' CAGCTCTGAGCAGATCATGAAGA3'     | In this paper  |
| 9     | BAX shRNA3   | 5' GACATGTTTTCTGACGGCAACTT3'     | In this paper  |

| Sr No | Gene name   | Forward primer sequence   | Reverse primer sequence | ref/ID        |
|-------|-------------|---------------------------|-------------------------|---------------|
| 4     | mt-tRNA     | CACCCAAGAACAGGGTTTGT      | TGGCCATGGGTATGTTGTTAA   | (1)           |
| 5     | Nuclear B2M | TGCTGTCTCCATGTTTGATGTATCT | TCTCTGCTCCCCACCTCTAAGT  | In this paper |
| 6     | ND1         | CGATTCCGCTACGACCAACT      | AGGTTTGAGGGGAATGCTG     | In this paper |
| 7     | ND2         | AGCACCACGACCCTACTACT      | TGGTGGGGATGATGAGGCTA    | In this paper |
| 8     | ND3         | GCGGCTTCGACCCTATATCC      | AGGGCTCATGGTAGGGGTAA    | (2)           |
| 9     | ND4         | TCGCTCACACCTCATATCCTC     | AGGCGGCAAAGACTAGTATGG   | (2)           |

|    |                 |                                              |                         |               |
|----|-----------------|----------------------------------------------|-------------------------|---------------|
| 10 | ND4             | CTCACTCTCACTGCCCAAGA                         | AGCCGCCTAGTTTCAAGAGT    | In this paper |
| 11 | ND5             | CACATCTGTACCCACGCCTT                         | AATGCTAGGCTGCCAATGGT    | In this paper |
| 12 | ND6             | CCTATTCCCCCGAGCAATCTC                        | GGAGGATCCTATTGGTGCGG    | In this paper |
| 13 | Cytochrome<br>c | GGGAGGCAAGCATAAGACTG                         | TATCCTCTCCCCAGGTGATG    | In this paper |
| 14 | COX-IV          | ACTACCCCTTGCTTGATGTG                         | GCCCACTGTCTTCCATT       | In this paper |
| 16 | IFNB1           | CCAGGGGAAAACTCATGAGC<br>GGTGCTGTGGGTGAAAGAGT | AGCAATTGTCCAGTCCCAGA    | In this paper |
| 18 | MCL-1           | AAGGCATGCTTCGGAAACTG                         | TGCTAATGGTTCGATGCAGC    | In this paper |
| 19 | BAX             | GACTATCATATGCTTACCGTAACTTG                   | GGTCGAGAATTCAAAAAGCTCTG | In this paper |
| 20 | BAK             | GACTATCATATGCTTACCGTAAC                      | GGTCGAGAATTCAAAAACCC    | In this paper |

| Synthetic fragment of ND-2                                                                                                                                                          |  |
|-------------------------------------------------------------------------------------------------------------------------------------------------------------------------------------|--|
| AGCACCACGACCCTACTACTATCTCGCACCTGAAACAAGCTAACATGACTAACACCCTTAATTCCATCCACCCTCC<br>TCTCCCTAGGAGGCCTGCCCCCGCTAACCGGCTTTTTGCCCAAATGGGCCATTATCGAAGAATTACAAAAAACAA<br>TAGCCTCATCATCCCCACCA |  |

1. Lin, C.S., H.T. Lee, M.H. Lee, S.C. Pan, C.Y. Ke, A.W. Chiu, and Y.H. Wei. 2016. Role of Mitochondrial DNA Copy Number Alteration in Human Renal Cell Carcinoma. *Int J Mol Sci.* 17.
2. Liu, Z., J. Tian, F. Peng, and J. Wang. 2022. Hypermethylation of mitochondrial DNA facilitates bone metastasis of renal cell carcinoma. *J Cancer.* 13:304-312.
